# Supplementary material for: Engineered Peptides Enable Biomimetic Route for Collagen Intrafibrillar Mineralization
Source: MDPI journal article supplement (doi:10.3390/ijms24076355), 2023-03-28
Supplement: s1 [file s1]

# Engineered Peptides Enable Biomimetic Route for Collagen Intrafibrillar Mineralization

Aya Cloyd <sup>1,2</sup>, Kyle Boone <sup>2,3</sup>, Qiang Ye <sup>2</sup>, Malcolm L. Snead <sup>4</sup>, Paulette Spencer <sup>1,2,3</sup> and Candan Tamerler <sup>1,2,3,\*</sup>

<sup>1</sup> Bioengineering Program, University of Kansas, Lawrence, KS 66045, USA

<sup>2</sup> Institute for Bioengineering Research, University of Kansas, Lawrence, KS 66045, USA

<sup>3</sup> Department of Mechanical Engineering, University of Kansas, Lawrence, KS 66045, USA

<sup>4</sup> Center for Craniofacial Molecular Biology, Herman Ostrow School of Dentistry of USC, University of Southern California, Los Angeles, CA 90007, USA

\* Correspondence: ctamerler@ku.edu

## Supplemental Table S1. Biochemical properties of peptides

Calculated using ExPasy ProtParam tool [47]

| Peptide name & chemical properties                                                                  | Peptide Sequence       |
|-----------------------------------------------------------------------------------------------------|------------------------|
| <b>CBP</b><br>MW: 960.19 g/mol<br>Theoretical pI: 11.17<br>Gravy Index: -0.850                      | TKKLTLRT               |
| <b>HABP1</b><br>MW: 761.90 g/mol<br>Theoretical pI: 6.69<br>Gravy Index: -0.129                     | MLPHHGA                |
| <b>CBP-(linker)-HABP1 (CBP-HABP1)</b><br>MW: 1943.34<br>Theoretical pI: 11.17<br>Gravy Index: -0.32 | TKKLTLRT-(APA)-MLPHHGA |

**Supplemental Table S2.** Statistics on PeakForce-QNM DMT Modulus pre/post mineralization

| Pre-mineralization           |          |                |                  |                      |
|------------------------------|----------|----------------|------------------|----------------------|
|                              | Collagen | Collagen-(CBP) | Collagen-(HABP1) | Collagen-(CBP-HABP1) |
| Mean (GPa)                   | 4.08     | 5.16           | 4.62             | 5.25                 |
| Standard Deviation (GPa)     | 0.010    | 0.018          | 0.057            | 0.039                |
| Variance (GPa <sup>2</sup> ) | 0.065    | 0.215          | 2.16             | 1.01                 |

| Post-mineralization          |          |                |                        |                      |
|------------------------------|----------|----------------|------------------------|----------------------|
|                              | Collagen | Collagen-(CBP) | Collagen-(HABP1)       | Collagen-(CBP-HABP1) |
| Mean (GPa)                   | 6.96     | 6.52           | 6.73                   | 5.89                 |
| Standard Deviation (GPa)     | 0.483    | 0.107          | 1.708                  | 0.140                |
| Variance (GPa <sup>2</sup> ) | 2.34     | 11.4           | 2.92 x 10 <sup>3</sup> | 19.6                 |

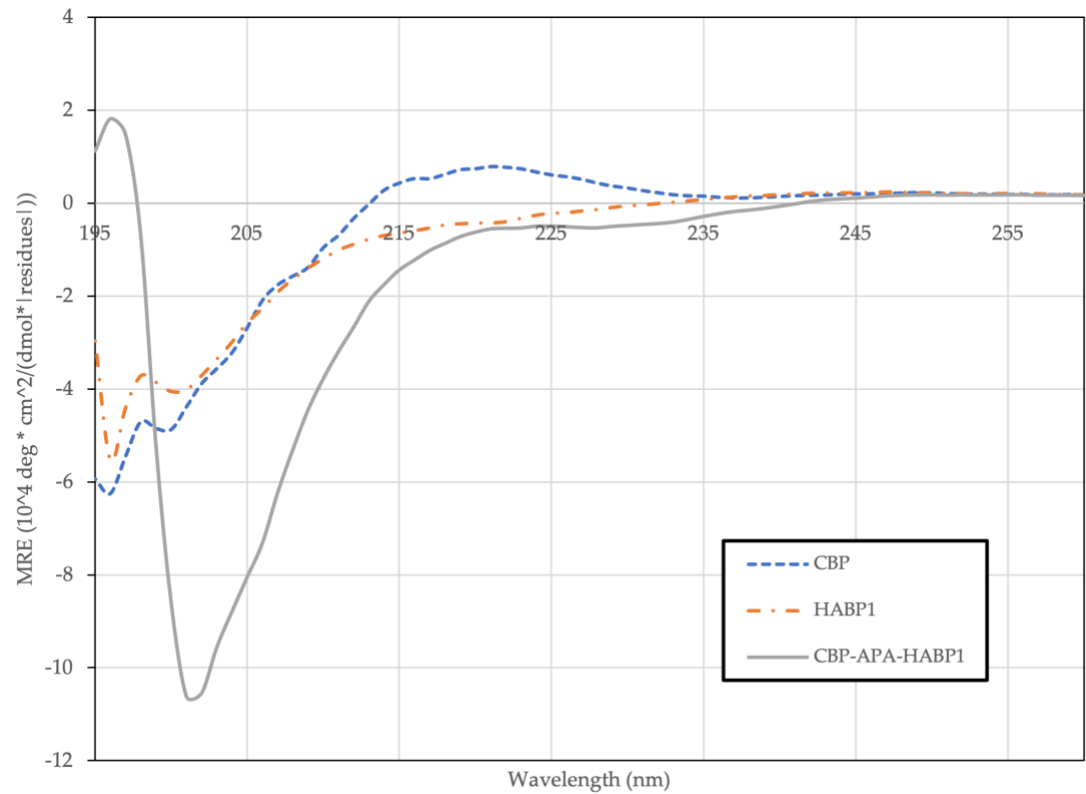

**Supplemental Figure S1.** Mean residue ellipticity (MRE) by circular dichroism of collagen binding peptide (CBP), hydroxyapatite peptide (HABP1) and bifunctional peptide (CBP--APA-HABP1), computed using CD Pro [52].

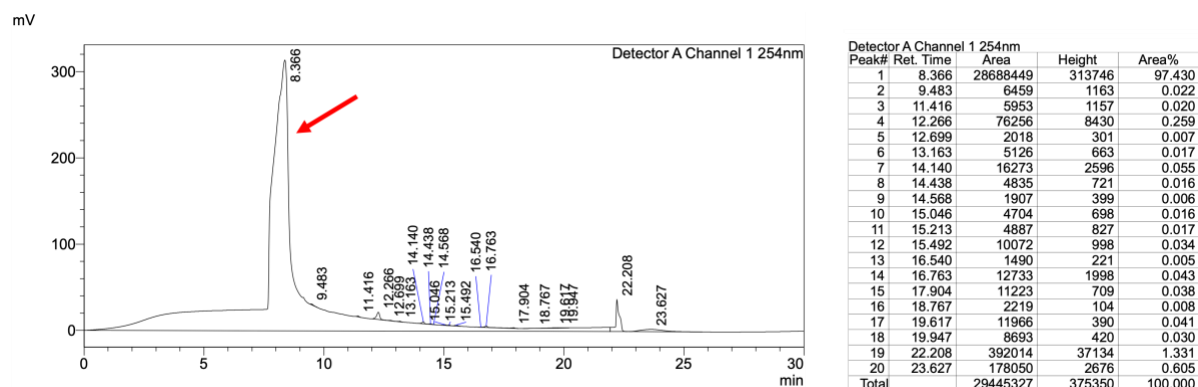

**Supplemental Figure S2.** Collagen binding peptide (CBP) analytical Shimadzu HPLC spectral report, red arrow signifying CBP spectral feature.

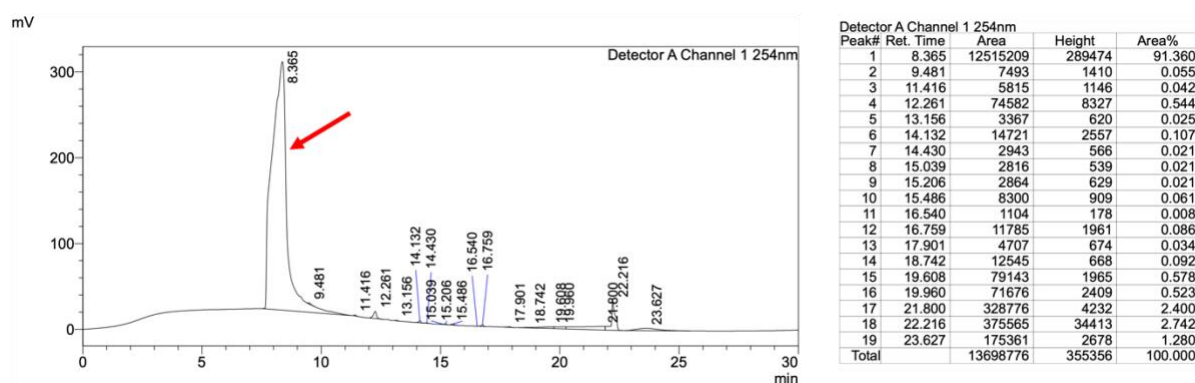

**Supplemental Figure S3.** Hydroxyapatite binding peptide (HABP1) analytical Shimadzu HPLC spectral report, red arrow signifying HABP1 spectral feature.

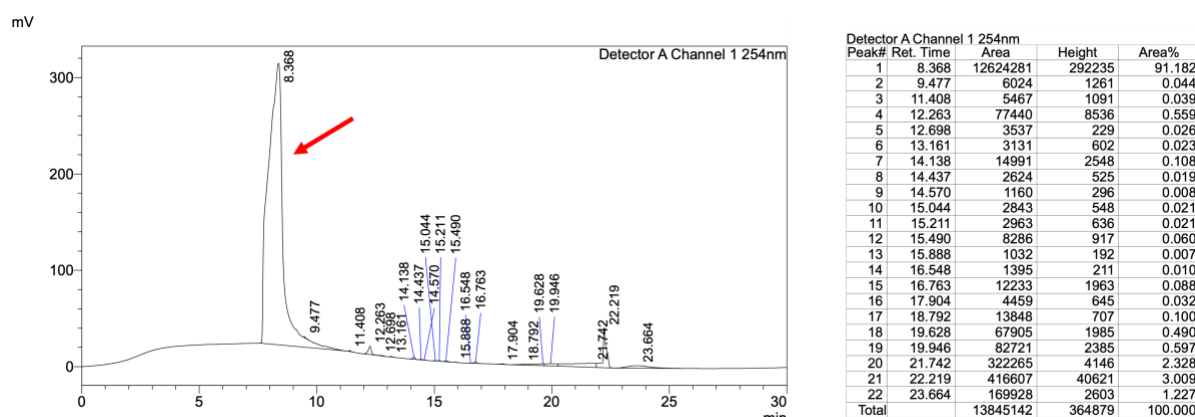

**Supplemental Figure S4.** Chimeric peptide (CBP-HABP1) analytical Shimadzu HPLC spectral report, red arrow signifying CBP-HABP1 spectral feature.

```

1 import numpy as np
2 from glob import glob
3 from pathlib import Path
4 from PIL import Image
5 import os
6 import cv2
7 from tqdm import tqdm
8 from matplotlib import pyplot as plt
9 from skimage.filters import threshold_multiotsu
10
11
12
13 # Path to the data directory
14 main_dir = Path("/INSERT PATH HERE")
15
16 # Set all tif files in within the data dir..
17 tifs = []
18 for child in os.listdir(main_dir):
19     print(child)
20     tifs.append(list((main_dir / child).glob("*.tif")))
21
22
23 def area_precentage(image):
24     '''Calculate the area of the pixels above a certain threshold is fixed to zero'''
25     pixels = len(np.column_stack(np.where(image > 0)))
26     image_area = image.shape[0] * image.shape[1]
27     area_ratio = round((pixels / image_area) * 100,2)
28     return area_ratio
29
30 def findArea (image, name):
31     #apply blur to remove the small bright spots
32     image = cv2.medianBlur(image, 7)
33
34     #equalize histogram
35     eq_image = cv2.equalizeHist(image.ravel()).reshape((image.shape[0],image.shape[1]))
36
37     # Find the thresholds in the histogram
38     # Set any value less than the smallest threshold to zero results in a binary image
39     (threshold, regions) = cv2.threshold(image, 0, 1, cv2.THRESH_BINARY | cv2.THRESH_OTSU)[1].astype(np.bool)
40
41     #calculate the area of the binary image
42     area = area_precentage(regions)
43
44     # Visualize results
45     fig, ax = plt.subplots(nrows=1, ncols=3, figsize=(15, 3))
46     im_ratio = regions.shape[0]/regions.shape[1]
47
48     # Plotting the original image
49     im1 = ax[0].imshow(image, cmap='gray')
50     ax[0].set_title('Original')
51     ax[0].axis('off')
52
53     # Plotting the histogram and the corresponding thresholds
54     im2 = ax[1].hist(eq_image.ravel(), bins=255)
55     ax[1].set_title('Histogram')
56     ax[1].axvline(threshold, color='r')
57
58     # Plotting the binary image
59     im3 = ax[2].imshow(regions, cmap='gray')
60     ax[2].set_title('Binary image area {:.3f}'.format(area))
61     ax[2].axis('off')
62
63     fig.colorbar(im3, ax=ax[2], orientation="vertical", fraction=0.047*im_ratio)
64
65     plt.tight_layout()
66     plt.show()
67     fig.savefig('INSERT PATH HERE' + name + '_{}.png'.format(area))
68     return np.uint8(regions)
69
70 # Iterate through loaded images
71 for i in tqdm(tifs):
72     for file in i:
73         name = str(file).split('\\')[-1].split('.')[0]
74         image = np.array(Image.open(file))[:1790,:] # PIL is the easiest library to load tif into python
75         regions = findArea(image, name)
76

```

**Supplemental Figure S5.** SEM image processing source code (Python 3.9.13)
